# Supplementary material for: Decline in cardiorespiratory fitness in the Swedish working force between 1995 and 2017
Source: PubMed Central journal article supplement (PMC7379642; doi:10.1111/sms.13328), 2018-11-15
Supplement: SMS-29-232-s001.pdf [file SMS-29-232-s001.pdf]

**Supplement Table 1.** Internal drop-out analyses within the available database, comparing individuals with (included) and without (excluded) VO<sub>2</sub>max.

| Year      | n       | Gender              |                            | Age                   |                          | Height                             |                                    | Weight                             |                                    | >12 years of education |                   |
|-----------|---------|---------------------|----------------------------|-----------------------|--------------------------|------------------------------------|------------------------------------|------------------------------------|------------------------------------|------------------------|-------------------|
|           |         | Included<br>% women | Excluded<br>n<br>% women   | Included<br>Mean (SD) | Excluded<br>Mean (SD)    | Included<br>Mean (SE) <sup>#</sup> | Excluded<br>Mean (SE) <sup>#</sup> | Included<br>Mean (SE) <sup>#</sup> | Excluded<br>Mean (SE) <sup>#</sup> | Included<br>%          | Excluded<br>%     |
| 1995-1997 | 4 574   | 52.4                | 815<br>41.6 <sup>a</sup>   | 40.9 (10.0)           | 43.3 (10.6) <sup>a</sup> | 172.6 (9.3)                        | 173.8 (9.7) <sup>a</sup>           | 74.8 (14.0)                        | 78.2 (14.8) <sup>a</sup>           | 13.7                   | 12.3              |
| 1998-1999 | 6 543   | 45.3                | 1 577<br>44.6              | 42.0 (10.3)           | 44.1 (10.8) <sup>a</sup> | 173.9 (9.1)                        | 174.0 (9.4)                        | 76.1 (14.0)                        | 77.9 (15.2) <sup>a</sup>           | 19.1                   | 19.5              |
| 2000-2001 | 12 545  | 49.5                | 3 370<br>48.4              | 42.3 (10.7)           | 45.4 (11.2) <sup>a</sup> | 173.3 (9.2)                        | 173.3 (9.5)                        | 76.0 (14.2)                        | 79.1 (15.6) <sup>a</sup>           | 20.8                   | 19.4              |
| 2002-2003 | 22 629  | 52.4                | 5 167<br>53.3              | 41.9 (11.2)           | 47.3 (11.1) <sup>a</sup> | 172.8 (9.2)                        | 172.4 (9.6) <sup>a</sup>           | 75.4 (14.4)                        | 79.0 (16.4) <sup>a</sup>           | 19.9                   | 17.7 <sup>a</sup> |
| 2004-2005 | 37 420  | 52.1                | 9 704<br>48.7 <sup>a</sup> | 42.8 (10.9)           | 47.5 (11.1) <sup>a</sup> | 173.0 (9.2)                        | 173.3 (9.5) <sup>a</sup>           | 75.9 (14.6)                        | 80.0 (16.4) <sup>a</sup>           | 25.3                   | 20.5 <sup>a</sup> |
| 2006-2007 | 38 519  | 48.6                | 9 703<br>46.0 <sup>a</sup> | 42.9 (11.1)           | 47.1 (11.4) <sup>a</sup> | 173.5 (9.3)                        | 173.6 (9.7)                        | 77.1 (15.0)                        | 80.5 (17.0) <sup>a</sup>           | 24.5                   | 20.3 <sup>a</sup> |
| 2008-2009 | 43 479  | 46.2                | 9 672<br>47.8 <sup>a</sup> | 42.8 (11.3)           | 46.7 (12.0) <sup>a</sup> | 173.9 (9.3)                        | 173.3 (9.7) <sup>a</sup>           | 77.9 (15.3)                        | 80.6 (17.9) <sup>a</sup>           | 25.9                   | 22.5 <sup>a</sup> |
| 2010-2011 | 39 177  | 44.2                | 7 758<br>45.6 <sup>a</sup> | 42.4 (11.2)           | 46.0 (12.0) <sup>a</sup> | 174.3 (9.4)                        | 173.8 (9.7) <sup>a</sup>           | 78.7 (15.5)                        | 82.0 (18.1) <sup>a</sup>           | 27.3                   | 22.9 <sup>a</sup> |
| 2012-2013 | 57 246  | 40.8                | 12 135<br>40.6             | 42.1 (11.3)           | 46.2 (11.7) <sup>a</sup> | 174.9 (9.3)                        | 174.9 (9.7)                        | 79.0 (15.4)                        | 82.8 (17.9) <sup>a</sup>           | 31.5                   | 26.2 <sup>a</sup> |
| 2014-2015 | 55 584  | 37.6                | 13 070<br>38.2             | 41.7 (11.5)           | 45.0 (12.3) <sup>a</sup> | 175.3 (9.2)                        | 175.2 (9.8)                        | 79.9 (15.7)                        | 83.2 (18.6) <sup>a</sup>           | 29.7                   | 24.6 <sup>a</sup> |
| 2016-2017 | 36 561  | 36.8                | 8 878<br>37.9              | 41.1 (11.7)           | 43.9 (12.4) <sup>a</sup> | 175.4 (9.3)                        | 175.6 (9.6)                        | 80.3 (16.0)                        | 83.3 (18.4) <sup>a</sup>           | 29.5                   | 26.5 <sup>a</sup> |
| Total     | 354 277 | 44.2                | 81 849<br>44.0             | 42.2 (11.2)           | 46.0 (11.8) <sup>a</sup> | 174.2 (9.3)                        | 174.1 (9.7) <sup>a</sup>           | 78.1 (15.3)                        | 81.4 (17.4) <sup>a</sup>           | 26.9                   | 22.8 <sup>a</sup> |

<sup>a</sup> Different from individuals with VO<sub>2</sub>max during the same time period ( $p > 0.05$ ) using chi<sup>2</sup>-test for percentages, independent t-test for age and general linear modelling for height and weight.

<sup>#</sup> Mean and SE values adjusted for age and gender

SD, standard deviation

SE, standard error
