# Supplementary material for: Decline in cardiorespiratory fitness in the Swedish working force between 1995 and 2017
Source: PubMed Central journal article supplement (PMC7379642; doi:10.1111/sms.13328), 2018-11-15
Supplement: SMS-29-232-s002.pdf [file SMS-29-232-s002.pdf]

**Supplement Table 2.** Change in VO<sub>2</sub>max (L·min<sup>-1</sup> and ml·min<sup>-1</sup>·kg<sup>-1</sup>) from 1995-1997 to 2016-2017 in the total population and by gender.

| Year  | Women                            |        |                                                     |        | Men                              |        |                                                     |        | Total       |                               |             |                                                  |
|-------|----------------------------------|--------|-----------------------------------------------------|--------|----------------------------------|--------|-----------------------------------------------------|--------|-------------|-------------------------------|-------------|--------------------------------------------------|
|       | L·min <sup>-1</sup><br>Mean (SD) | Change | ml·min <sup>-1</sup> ·kg <sup>-1</sup><br>Mean (SD) | Change | L·min <sup>-1</sup><br>Mean (SD) | Change | ml·min <sup>-1</sup> ·kg <sup>-1</sup><br>Mean (SD) | Change | Mean (SD)   | L·min <sup>-1</sup><br>Change | Mean (SD)   | ml·min <sup>-1</sup> ·kg <sup>-1</sup><br>Change |
| 95-97 | 2.47 (0.07)                      | Ref    | 38.1 (1.27)                                         | Ref    | 3.16 (0.09)                      | Ref    | 39.0 (1.22)                                         | Ref    | 2.80 (0.08) | Ref                           | 38.5 (0.90) | Ref                                              |
| 98-99 | 2.42 (0.09)                      | -2,1%  | 36.8 (1.40)                                         | -3,4%  | 3.05 (0.10)                      | -3,4%  | 37.5 (1.45)                                         | -3,9%  | 2.74 (0.09) | -2,2%                         | 37.1 (1.00) | -3,6%                                            |
| 00-01 | 2.45 (0.08)                      | -1,0%  | 36.9 (1.33)                                         | -3,2%  | 3.04 (0.10)                      | -3,9%  | 36.7 (1.49)                                         | -5,9%  | 2.75 (0.08) | -1,8%                         | 36.8 (0.99) | -4,4%                                            |
| 02-03 | 2.33 (0.08)                      | -5,8%  | 35.2 (1.28)                                         | -7,5%  | 2.94 (0.10)                      | -6,9%  | 35.9 (1.39)                                         | -8,0%  | 2.64 (0.08) | -5,8%                         | 35.6 (0.94) | -7,6%                                            |
| 04-05 | 2.35 (0.07)                      | -4,9%  | 35.2 (1.32)                                         | -7,7%  | 2.97 (0.09)                      | -6,1%  | 36.4 (1.16)                                         | -6,6%  | 2.66 (0.08) | -4,9%                         | 35.8 (0.87) | -7,0%                                            |
| 06-07 | 2.37 (0.07)                      | -4,1%  | 35.4 (1.22)                                         | -7,1%  | 2.97 (0.09)                      | -6,1%  | 35.9 (1.15)                                         | -8,0%  | 2.67 (0.07) | -4,6%                         | 35.6 (0.83) | -7,4%                                            |
| 08-09 | 2.39 (0.07)                      | -3,1%  | 35.5 (1.19)                                         | -6,8%  | 2.97 (0.09)                      | -6,1%  | 35.7 (1.21)                                         | -8,5%  | 2.68 (0.07) | -4,2%                         | 35.6 (0.84) | -7,5%                                            |
| 10-11 | 2.38 (0.07)                      | -3,5%  | 35.1 (1.25)                                         | -7,8%  | 2.99 (0.08)                      | -5,5%  | 35.7 (1.11)                                         | -8,5%  | 2.69 (0.07) | -4,0%                         | 35.4 (0.83) | -8,1%                                            |
| 12-13 | 2.38 (0.07)                      | -3,8%  | 35.0 (1.21)                                         | -8,2%  | 2.92 (0.09)                      | -7,5%  | 35.0 (1.18)                                         | -10,3% | 2.65 (0.07) | -5,3%                         | 35.0 (0.83) | -9,1%                                            |
| 14-15 | 2.34 (0.07)                      | -5,2%  | 34.4 (1.17)                                         | -9,7%  | 2.90 (0.08)                      | -8,4%  | 34.4 (1.08)                                         | -11,7% | 2.62 (0.07) | -6,4%                         | 34.4 (0.79) | -10,6%                                           |
| 16-17 | 2.34 (0.07)                      | -5,3%  | 34.5 (1.12)                                         | -9,4%  | 2.88 (0.08)                      | -8,7%  | 34.2 (1.09)                                         | -12,4% | 2.61 (0.07) | -6,7%                         | 34.3 (0.77) | -10,8%                                           |
