# Supplementary material for: Decline in cardiorespiratory fitness in the Swedish working force between 1995 and 2017
Source: PubMed Central journal article supplement (PMC7379642; doi:10.1111/sms.13328), 2018-11-15
Supplement: SMS-29-232-s003.pdf [file SMS-29-232-s003.pdf]

**Supplement Table 3.** Change in VO<sub>2</sub>max (L·min<sup>-1</sup> and ml·min<sup>-1</sup>·kg<sup>-1</sup>) from 1995-1997 to 2016-2017 in the total population and by age-group.

| Year  | 18-34 years |                                  |        |                                                     |        | 35-49 years |                                  |        |                                                     |        | 50-74 years |                                  |        |                                                     |        |
|-------|-------------|----------------------------------|--------|-----------------------------------------------------|--------|-------------|----------------------------------|--------|-----------------------------------------------------|--------|-------------|----------------------------------|--------|-----------------------------------------------------|--------|
|       | n           | L·min <sup>-1</sup><br>Mean (SD) | Change | ml·min <sup>-1</sup> ·kg <sup>-1</sup><br>Mean (SD) | Change | n           | L·min <sup>-1</sup><br>Mean (SD) | Change | ml·min <sup>-1</sup> ·kg <sup>-1</sup><br>Mean (SD) | Change | n           | L·min <sup>-1</sup><br>Mean (SD) | Change | ml·min <sup>-1</sup> ·kg <sup>-1</sup><br>Mean (SD) | Change |
| 95-97 | 1 354       | 3.19 (0.17)                      | Ref    | 43.9 (0.72)                                         | Ref    | 2 195       | 2.82 (0.16)                      | Ref    | 38.0 (0.52)                                         | Ref    | 1 025       | 2.44 (0.14)                      | Ref    | 32.5 (0.68)                                         | Ref    |
| 98-99 | 1 840       | 3.19 (0.16)                      | -0,1%  | 43.7 (0.64)                                         | -0,5%  | 2 849       | 2.80 (0.14)                      | -0,6%  | 37.5 (0.39)                                         | -1,4%  | 1 854       | 2.42 (0.12)                      | -0,7%  | 32.3 (0.51)                                         | -0,7%  |
| 00-01 | 3 469       | 3.16 (0.16)                      | -1,0%  | 43.0 (0.76)                                         | -2,0%  | 5 248       | 2.82 (0.14)                      | -0,1%  | 37.5 (0.70)                                         | -1,3%  | 3 828       | 2.40 (0.13)                      | -1,7%  | 31.8 (0.56)                                         | -2,1%  |
| 02-03 | 6 563       | 3.09 (0.17)                      | -3,3%  | 42.3 (0.68)                                         | -3,7%  | 9 429       | 2.78 (0.15)                      | -1,4%  | 36.8 (0.70)                                         | -3,1%  | 6 637       | 2.35 (0.13)                      | -3,7%  | 31.2 (0.60)                                         | -3,9%  |
| 04-05 | 9 617       | 3.09 (0.16)                      | -3,0%  | 42.2 (0.57)                                         | -3,9%  | 16 294      | 2.78 (0.15)                      | -1,3%  | 36.7 (0.69)                                         | -3,5%  | 11 509      | 2.35 (0.13)                      | -3,6%  | 31.1 (0.50)                                         | -4,4%  |
| 06-07 | 9 743       | 3.08 (0.15)                      | -3,4%  | 41.7 (0.61)                                         | -4,9%  | 16 867      | 2.79 (0.15)                      | -0,9%  | 36.5 (0.69)                                         | -3,9%  | 11 909      | 2.37 (0.13)                      | -2,9%  | 31.2 (0.56)                                         | -4,1%  |
| 08-09 | 11 268      | 3.07 (0.15)                      | -3,7%  | 41.6 (0.70)                                         | -5,2%  | 18 652      | 2.82 (0.15)                      | -0,1%  | 36.6 (0.87)                                         | -3,6%  | 13 559      | 2.39 (0.12)                      | -2,0%  | 31.2 (0.59)                                         | -4,1%  |
| 10-11 | 10 340      | 3.06 (0.15)                      | -4,0%  | 41.3 (0.78)                                         | -5,8%  | 17 618      | 2.83 (0.15)                      | 0,2%   | 36.5 (0.86)                                         | -3,8%  | 11 219      | 2.41 (0.13)                      | -1,2%  | 31.1 (0.58)                                         | -4,2%  |
| 12-13 | 15 737      | 3.04 (0.14)                      | -4,7%  | 41.0 (0.82)                                         | -6,7%  | 25 651      | 2.79 (0.14)                      | -1,1%  | 36.2 (0.94)                                         | -4,7%  | 15 858      | 2.38 (0.12)                      | -2,3%  | 30.8 (0.56)                                         | -5,2%  |
| 14-15 | 16 428      | 2.99 (0.14)                      | -6,4%  | 40.1 (0.67)                                         | -8,5%  | 23 725      | 2.75 (0.13)                      | -2,5%  | 35.6 (0.90)                                         | -6,4%  | 15 431      | 2.37 (0.12)                      | -2,7%  | 30.5 (0.65)                                         | -6,2%  |
| 16-17 | 11 944      | 2.98 (0.14)                      | -6,5%  | 39.9 (0.77)                                         | -9,2%  | 14 693      | 2.73 (0.13)                      | -3,2%  | 35.3 (0.84)                                         | -7,1%  | 9 924       | 2.38 (0.13)                      | -2,3%  | 30.5 (0.71)                                         | -6,1%  |
