# Supplementary material for: Decline in cardiorespiratory fitness in the Swedish working force between 1995 and 2017
Source: PubMed Central journal article supplement (PMC7379642; doi:10.1111/sms.13328), 2018-11-15
Supplement: SMS-29-232-s004.pdf [file SMS-29-232-s004.pdf]

**Supplement Table 4.** Change in VO<sub>2</sub>max (ml·min<sup>-1</sup>·kg<sup>-1</sup>) from 1995-1997 to 2016-2017 in relation to length of education.

| Year  | n     | ≤9 years            |        |                                        |        | 10-12 years         |             |                                        |             | ≥12 years           |        |                                        |        |             |        |
|-------|-------|---------------------|--------|----------------------------------------|--------|---------------------|-------------|----------------------------------------|-------------|---------------------|--------|----------------------------------------|--------|-------------|--------|
|       |       | L·min <sup>-1</sup> |        | ml·min <sup>-1</sup> ·kg <sup>-1</sup> |        | L·min <sup>-1</sup> |             | ml·min <sup>-1</sup> ·kg <sup>-1</sup> |             | L·min <sup>-1</sup> |        | ml·min <sup>-1</sup> ·kg <sup>-1</sup> |        |             |        |
|       |       | Mean (SD)           | Change | Mean (SD)                              | Change | n                   | Mean (SD)   | Change                                 | Mean (SD)   | Change              | n      | Mean (SD)                              | Change | Mean (SD)   | Change |
| 95-97 | 731   | 2.74 (0.12)         | Ref    | 36.2 (1.30)                            | Ref    | 3 216               | 2.80 (0.15) | Ref                                    | 38.5 (1.55) | Ref                 | 627    | 2.84 (0.13)                            | Ref    | 39.9 (1.45) | Ref    |
| 98-99 | 880   | 2.64 (0.14)         | -3,5%  | 34.5 (2.09)                            | -4,6%  | 4 416               | 2.72 (0.16) | -2,7%                                  | 37.1 (1.67) | -3,7%               | 1 247  | 2.83 (0.13)                            | -0,2%  | 39.0 (1.64) | -2,2%  |
| 00-01 | 1 543 | 2.63 (0.12)         | -4,2%  | 35.0 (1.50)                            | -3,3%  | 8 398               | 2.80 (0.13) | -0,1%                                  | 36.9 (1.59) | -4,2%               | 2 604  | 2.71 (0.17)                            | -4,5%  | 37.6 (2.19) | -5,7%  |
| 02-03 | 2 572 | 2.43 (0.15)         | -11,5% | 32.5 (1.84)                            | -10,3% | 15 551              | 2.66 (0.14) | -5,0%                                  | 35.5 (1.56) | -7,8%               | 4 506  | 2.74 (0.13)                            | -3,6%  | 37.9 (1.51) | -4,9%  |
| 04-05 | 3 625 | 2.55 (0.14)         | -7,1%  | 33.8 (1.68)                            | -6,6%  | 24 312              | 2.67 (0.13) | -4,7%                                  | 35.6 (1.46) | -7,5%               | 9 483  | 2.72 (0.13)                            | -4,1%  | 37.8 (1.52) | -5,3%  |
| 06-07 | 3 909 | 2.57 (0.14)         | -6,3%  | 33.5 (1.60)                            | -7,4%  | 25 167              | 2.67 (0.13) | -4,7%                                  | 35.4 (1.39) | -8,1%               | 9 443  | 2.75 (0.13)                            | -3,3%  | 37.9 (1.36) | -4,9%  |
| 08-09 | 4 171 | 2.51 (0.12)         | -8,2%  | 32.7 (1.64)                            | -9,6%  | 28 057              | 2.69 (0.13) | -3,9%                                  | 35.4 (1.33) | -8,1%               | 11 251 | 2.78 (0.13)                            | -2,1%  | 38.3 (1.43) | -4,0%  |
| 10-11 | 3 626 | 2.55 (0.12)         | -7,0%  | 32.9 (1.38)                            | -9,2%  | 24 837              | 2.68 (0.13) | -4,2%                                  | 35.0 (1.38) | -9,1%               | 10 714 | 2.80 (0.13)                            | -1,5%  | 38.3 (1.41) | -4,1%  |
| 12-13 | 4 384 | 2.47 (0.11)         | -9,7%  | 31.9 (1.42)                            | -11,8% | 34 838              | 2.67 (0.12) | -4,8%                                  | 34.7 (1.35) | -9,8%               | 18 024 | 2.75 (0.13)                            | -3,3%  | 37.9 (1.46) | -5,0%  |
| 14-15 | 4 053 | 2.45 (0.12)         | -10,6% | 31.5 (1.41)                            | -13,1% | 35 047              | 2.63 (0.12) | -5,9%                                  | 34.2 (1.26) | -11,2%              | 16 484 | 2.71 (0.12)                            | -4,6%  | 37.2 (1.34) | -6,7%  |
| 16-17 | 2 446 | 2.43 (0.12)         | -11,4% | 31.6 (1.22)                            | -12,8% | 23 341              | 2.63 (0.12) | -6,2%                                  | 34.1 (1.30) | -11,5%              | 10 774 | 2.71 (0.12)                            | -4,5%  | 37.1 (1.27) | -7,0%  |
