# Supplementary material for: Decline in cardiorespiratory fitness in the Swedish working force between 1995 and 2017
Source: PubMed Central journal article supplement (PMC7379642; doi:10.1111/sms.13328), 2018-11-15
Supplement: SMS-29-232-s005.pdf [file SMS-29-232-s005.pdf]

**Supplement Table 5.** Change in VO<sub>2</sub>max (ml·min<sup>-1</sup>·kg<sup>-1</sup>) from 1995-1997 to 2016-2017 in relation to region.

| Year  | n     | Urban counties      |        |                                        |        | Rural counties      |             |                                        |             | All other counties  |       |                                        |        |             |        |
|-------|-------|---------------------|--------|----------------------------------------|--------|---------------------|-------------|----------------------------------------|-------------|---------------------|-------|----------------------------------------|--------|-------------|--------|
|       |       | L·min <sup>-1</sup> |        | ml·min <sup>-1</sup> ·kg <sup>-1</sup> |        | L·min <sup>-1</sup> |             | ml·min <sup>-1</sup> ·kg <sup>-1</sup> |             | L·min <sup>-1</sup> |       | ml·min <sup>-1</sup> ·kg <sup>-1</sup> |        |             |        |
|       |       | Mean (SD)           | Change | Mean (SD)                              | Change | n                   | Mean (SD)   | Change                                 | Mean (SD)   | Change              | n     | Mean (SD)                              | Change | Mean (SD)   | Change |
| 95-97 | 882   | 2.72 (0.05)         | Ref    | 37.4 (0.60)                            | Ref    | 2241                | 2.82 (0.05) | Ref                                    | 38.2 (0.54) | Ref                 | 1451  | 2.88 (0.05)                            | Ref    | 39.7 (0.57) | Ref    |
| 98-99 | 2017  | 2.72 (0.06)         | 0,2%   | 37.3 (0.68)                            | -0,3%  | 2565                | 2.86 (0.05) | 1,4%                                   | 38.3 (0.53) | 0,4%                | 1961  | 2.78 (0.04)                            | -3,5%  | 37.7 (0.46) | -5,1%  |
| 00-01 | 4629  | 2.76 (0.05)         | 1,6%   | 37.2 (0.62)                            | -0,5%  | 3171                | 2.83 (0.04) | 0,2%                                   | 37.5 (0.48) | -1,9%               | 4744  | 2.78 (0.04)                            | -3,5%  | 37.6 (0.50) | -5,3%  |
| 02-03 | 9973  | 2.62 (0.05)         | -3,6%  | 35.5 (0.54)                            | -5,1%  | 5659                | 2.70 (0.04) | -4,2%                                  | 35.6 (0.56) | -6,8%               | 6996  | 2.73 (0.04)                            | -5,4%  | 36.8 (0.53) | -7,4%  |
| 04-05 | 15177 | 2.64 (0.04)         | -2,8%  | 35.3 (0.54)                            | -5,8%  | 9660                | 2.66 (0.04) | -5,9%                                  | 35.5 (0.47) | -6,9%               | 12580 | 2.71 (0.04)                            | -6,0%  | 36.9 (0.46) | -7,0%  |
| 06-07 | 17130 | 2.65 (0.04)         | -2,4%  | 35.6 (0.47)                            | -4,9%  | 8053                | 2.68 (0.05) | -5,0%                                  | 35.3 (0.48) | -7,6%               | 13332 | 2.68 (0.04)                            | -6,8%  | 35.9 (0.50) | -9,6%  |
| 08-09 | 22928 | 2.69 (0.04)         | -1,0%  | 35.9 (0.47)                            | -4,1%  | 8028                | 2.66 (0.04) | -5,6%                                  | 34.5 (0.51) | -9,6%               | 12519 | 2.68 (0.04)                            | -7,0%  | 35.5 (0.50) | -10,5% |
| 10-11 | 20374 | 2.69 (0.04)         | -0,9%  | 35.6 (0.48)                            | -4,9%  | 6129                | 2.70 (0.04) | -4,3%                                  | 35.5 (0.42) | -7,1%               | 12669 | 2.68 (0.04)                            | -7,0%  | 35.2 (0.48) | -11,4% |
| 12-13 | 31735 | 2.64 (0.04)         | -2,9%  | 35.0 (0.49)                            | -6,5%  | 7736                | 2.68 (0.04) | -4,9%                                  | 34.7 (0.43) | -9,1%               | 17768 | 2.66 (0.04)                            | -7,6%  | 35.0 (0.49) | -11,8% |
| 14-15 | 28977 | 2.60 (0.04)         | -4,2%  | 34.4 (0.45)                            | -8,1%  | 9383                | 2.64 (0.04) | -6,3%                                  | 34.2 (0.43) | -10,5%              | 17220 | 2.65 (0.04)                            | -8,1%  | 34.6 (0.45) | -12,8% |
| 16-17 | 13652 | 2.62 (0.03)         | -3,5%  | 34.5 (0.40)                            | -7,8%  | 4589                | 2.64 (0.03) | -6,5%                                  | 34.2 (0.40) | -10,5%              | 7317  | 2.61 (0.04)                            | -9,4%  | 34.2 (0.39) | -14,0% |
