# Supplementary material for: Decline in cardiorespiratory fitness in the Swedish working force between 1995 and 2017
Source: PubMed Central journal article supplement (PMC7379642; doi:10.1111/sms.13328), 2018-11-15
Supplement: SMS-29-232-s006.pdf [file SMS-29-232-s006.pdf]

**Supplement Table 6.** Change in VO<sub>2</sub>max (L·min<sup>-1</sup> and ml·min<sup>-1</sup>·kg<sup>-1</sup>) from 1995-1997 to 2016-2017 in relation to sex and age.

| <b>Women</b>       |       |                     |        |                                        |        |                    |                     |        |                                        |        |       |                     |        |                                        |        |  |
|--------------------|-------|---------------------|--------|----------------------------------------|--------|--------------------|---------------------|--------|----------------------------------------|--------|-------|---------------------|--------|----------------------------------------|--------|--|
| <b>18-34 years</b> |       |                     |        |                                        |        | <b>35-49 years</b> |                     |        |                                        |        |       | <b>50-74 years</b>  |        |                                        |        |  |
| Year               | n     | L·min <sup>-1</sup> |        | ml·min <sup>-1</sup> ·kg <sup>-1</sup> |        | n                  | L·min <sup>-1</sup> |        | ml·min <sup>-1</sup> ·kg <sup>-1</sup> |        | n     | L·min <sup>-1</sup> |        | ml·min <sup>-1</sup> ·kg <sup>-1</sup> |        |  |
|                    |       | Mean (SD)           | Change | Mean (SD)                              | Change |                    | Mean (SD)           | Change | Mean (SD)                              | Change |       | Mean (SD)           | Change | Mean (SD)                              | Change |  |
| 95-97              | 646   | 2.82 (0.05)         | Ref    | 43.8 (1.09)                            | Ref    | 1 160              | 2.47 (0.03)         | Ref    | 37.4 (0.84)                            | Ref    | 589   | 2.13 (0.05)         | Ref    | 31.5 (1.03)                            | Ref    |  |
| 98-99              | 767   | 2.82 (0.05)         | -0,1%  | 43.1 (1.14)                            | -1,6%  | 1 302              | 2.50 (0.02)         | 1,2%   | 37.5 (0.53)                            | 0,3%   | 895   | 2.16 (0.04)         | 1,3%   | 31.9 (0.81)                            | 1,4%   |  |
| 00-01              | 1 626 | 2.80 (0.06)         | -0,5%  | 42.6 (1.26)                            | -2,7%  | 2 592              | 2.51 (0.05)         | 1,7%   | 37.6 (1.11)                            | 0,6%   | 1 988 | 2.13 (0.02)         | -0,2%  | 31.5 (0.71)                            | -0,1%  |  |
| 02-03              | 2 897 | 2.72 (0.05)         | -3,7%  | 41.7 (1.01)                            | -4,7%  | 5 026              | 2.45 (0.04)         | -1,0%  | 36.5 (1.03)                            | -2,4%  | 3 935 | 2.06 (0.04)         | -3,3%  | 30.5 (0.79)                            | -3,3%  |  |
| 04-05              | 4 397 | 2.73 (0.04)         | -3,2%  | 41.9 (0.95)                            | -4,3%  | 8 724              | 2.45 (0.04)         | -0,6%  | 36.4 (1.00)                            | -2,6%  | 6 379 | 2.07 (0.03)         | -2,7%  | 30.5 (0.62)                            | -3,2%  |  |
| 06-07              | 4 257 | 2.74 (0.03)         | -2,7%  | 41.8 (0.84)                            | -4,6%  | 8 185              | 2.47 (0.04)         | 0,2%   | 36.4 (0.94)                            | -2,7%  | 6 272 | 2.09 (0.05)         | -1,8%  | 30.6 (0.93)                            | -2,7%  |  |
| 08-09              | 4 765 | 2.74 (0.04)         | -3,0%  | 41.6 (1.16)                            | -5,1%  | 8 660              | 2.50 (0.07)         | 1,3%   | 36.6 (1.32)                            | -2,0%  | 6 643 | 2.13 (0.05)         | -0,1%  | 30.9 (0.94)                            | -2,0%  |  |
| 10-11              | 4 087 | 2.74 (0.07)         | -2,9%  | 41.4 (1.46)                            | -5,4%  | 8 000              | 2.51 (0.05)         | 1,7%   | 36.5 (1.26)                            | -2,3%  | 5 214 | 2.13 (0.05)         | 0,0%   | 30.7 (0.81)                            | -2,5%  |  |
| 12-13              | 5 727 | 2.73 (0.06)         | -3,3%  | 41.1 (1.44)                            | -6,2%  | 10 823             | 2.50 (0.05)         | 1,1%   | 36.5 (1.33)                            | -2,4%  | 6 786 | 2.13 (0.04)         | 0,1%   | 30.6 (0.91)                            | -2,8%  |  |
| 14-15              | 5 671 | 2.68 (0.04)         | -5,1%  | 40.4 (1.00)                            | -7,8%  | 9 457              | 2.46 (0.06)         | -0,2%  | 35.8 (1.42)                            | -4,2%  | 5 766 | 2.12 (0.06)         | -0,5%  | 30.3 (1.09)                            | -3,8%  |  |
| 16-17              | 3 743 | 2.67 (0.07)         | -5,3%  | 40.2 (1.38)                            | -8,2%  | 5 904              | 2.45 (0.05)         | -0,9%  | 35.7 (1.23)                            | -4,6%  | 3 817 | 2.12 (0.07)         | -0,6%  | 30.4 (1.14)                            | -3,6%  |  |

  

| <b>Men</b>         |        |                     |        |                                        |        |                    |                     |        |                                        |        |       |                     |        |                                        |        |  |
|--------------------|--------|---------------------|--------|----------------------------------------|--------|--------------------|---------------------|--------|----------------------------------------|--------|-------|---------------------|--------|----------------------------------------|--------|--|
| <b>18-34 years</b> |        |                     |        |                                        |        | <b>35-49 years</b> |                     |        |                                        |        |       | <b>50-74 years</b>  |        |                                        |        |  |
| Year               | n      | L·min <sup>-1</sup> |        | ml·min <sup>-1</sup> ·kg <sup>-1</sup> |        | n                  | L·min <sup>-1</sup> |        | ml·min <sup>-1</sup> ·kg <sup>-1</sup> |        | n     | L·min <sup>-1</sup> |        | ml·min <sup>-1</sup> ·kg <sup>-1</sup> |        |  |
|                    |        | Mean (SD)           | Change | Mean (SD)                              | Change |                    | Mean (SD)           | Change | Mean (SD)                              | Change |       | Mean (SD)           | Change | Mean (SD)                              | Change |  |
| 95-97              | 708    | 3.54 (0.08)         | Ref    | 43.9 (1.19)                            | Ref    | 1 035              | 3.16 (0.03)         | Ref    | 38.5 (0.59)                            | Ref    | 436   | 2.74 (0.03)         | Ref    | 33.5 (0.42)                            | Ref    |  |
| 98-99              | 1 073  | 3.54 (0.05)         | -0,1%  | 44.3 (0.65)                            | 0,8%   | 1 547              | 3.10 (0.04)         | -1,9%  | 37.4 (0.69)                            | -2,8%  | 959   | 2.69 (0.04)         | -1,8%  | 32.6 (0.72)                            | -2,7%  |  |
| 00-01              | 1 843  | 3.49 (0.09)         | -1,3%  | 43.4 (1.09)                            | -1,2%  | 2 656              | 3.12 (0.06)         | -1,4%  | 37.4 (1.10)                            | -2,9%  | 1 840 | 2.67 (0.07)         | -2,5%  | 32.2 (0.97)                            | -4,0%  |  |
| 02-03              | 3 666  | 3.44 (0.08)         | -2,9%  | 42.7 (1.03)                            | -2,6%  | 4 403              | 3.11 (0.07)         | -1,7%  | 37.2 (1.14)                            | -3,5%  | 2 702 | 2.64 (0.06)         | -3,6%  | 32.0 (0.79)                            | -4,6%  |  |
| 04-05              | 5 220  | 3.44 (0.05)         | -2,8%  | 42.4 (0.82)                            | -3,4%  | 7 570              | 3.10 (0.07)         | -1,8%  | 36.9 (1.15)                            | -4,1%  | 5 130 | 2.63 (0.04)         | -4,0%  | 31.7 (0.73)                            | -5,5%  |  |
| 06-07              | 5 486  | 3.40 (0.06)         | -3,9%  | 41.7 (1.06)                            | -5,1%  | 8 682              | 3.11 (0.07)         | -1,7%  | 36.6 (1.21)                            | -4,9%  | 5 637 | 2.65 (0.05)         | -3,3%  | 31.7 (0.65)                            | -5,3%  |  |
| 08-09              | 6 503  | 3.40 (0.07)         | -4,1%  | 41.7 (1.07)                            | -5,1%  | 9 992              | 3.13 (0.08)         | -1,0%  | 36.6 (1.42)                            | -5,0%  | 6 916 | 2.66 (0.06)         | -3,0%  | 31.5 (0.89)                            | -6,0%  |  |
| 10-11              | 6 253  | 3.37 (0.07)         | -4,8%  | 41.2 (0.96)                            | -6,0%  | 9 618              | 3.13 (0.08)         | -0,8%  | 36.6 (1.46)                            | -5,0%  | 6 005 | 2.69 (0.06)         | -1,8%  | 31.6 (0.92)                            | -5,8%  |  |
| 12-13              | 10 010 | 3.34 (0.07)         | -5,6%  | 40.8 (1.15)                            | -7,0%  | 14 828             | 3.07 (0.09)         | -2,7%  | 36.0 (1.59)                            | -6,6%  | 9 072 | 2.64 (0.06)         | -3,8%  | 31.0 (0.84)                            | -7,5%  |  |
| 14-15              | 10 757 | 3.28 (0.07)         | -7,3%  | 39.9 (1.10)                            | -9,0%  | 14 268             | 3.03 (0.06)         | -4,2%  | 35.3 (1.39)                            | -8,4%  | 9 665 | 2.63 (0.07)         | -4,1%  | 30.7 (0.96)                            | -8,5%  |  |
| 16-17              | 8 201  | 3.28 (0.06)         | -7,3%  | 39.6 (0.99)                            | -9,9%  | 8 789              | 3.01 (0.07)         | -4,9%  | 34.9 (1.38)                            | -9,2%  | 6 107 | 2.65 (0.08)         | -3,2%  | 30.6 (1.10)                            | -8,5%  |  |
