# Supplementary material for: Decline in cardiorespiratory fitness in the Swedish working force between 1995 and 2017
Source: PubMed Central journal article supplement (PMC7379642; doi:10.1111/sms.13328), 2018-11-15
Supplement: SMS-29-232-s007.pdf [file SMS-29-232-s007.pdf]

**Supplement Table 7.** Change in VO<sub>2</sub>max (L·min<sup>-1</sup> and ml·min<sup>-1</sup>·kg<sup>-1</sup>) from 1995-1997 to 2016-2017 in relation to sex and length of education.

| <b>Women</b>    |       |                     |        |                                        |        |                    |                     |        |                                        |        |                  |                     |        |                                        |        |
|-----------------|-------|---------------------|--------|----------------------------------------|--------|--------------------|---------------------|--------|----------------------------------------|--------|------------------|---------------------|--------|----------------------------------------|--------|
| <b>≤9 years</b> |       |                     |        |                                        |        | <b>10-12 years</b> |                     |        |                                        |        | <b>≥12 years</b> |                     |        |                                        |        |
| Year            | n     | L·min <sup>-1</sup> |        | ml·min <sup>-1</sup> ·kg <sup>-1</sup> |        | n                  | L·min <sup>-1</sup> |        | ml·min <sup>-1</sup> ·kg <sup>-1</sup> |        | n                | L·min <sup>-1</sup> |        | ml·min <sup>-1</sup> ·kg <sup>-1</sup> |        |
|                 |       | Mean (SD)           | Change | Mean (SD)                              | Change |                    | Mean (SD)           | Change | Mean (SD)                              | Change |                  | Mean (SD)           | Change | Mean (SD)                              | Change |
| 95-97           | 278   | 2.41 (0.12)         | Ref    | 36.1 (2.42)                            | Ref    | 1 719              | 2.44 (0.12)         | Ref    | 37.6 (2.18)                            | Ref    | 398              | 2.59 (0.12)         | Ref    | 40.2 (2.16)                            | Ref    |
| 98-99           | 324   | 2.44 (0.15)         | 1,4%   | 36.5 (2.65)                            | 1,2%   | 1 998              | 2.35 (0.17)         | -3,9%  | 35.7 (2.39)                            | -5,0%  | 642              | 2.59 (0.14)         | 0,1%   | 39.6 (2.37)                            | -1,5%  |
| 00-01           | 721   | 2.33 (0.10)         | -3,2%  | 33.9 (1.99)                            | -6,0%  | 4 172              | 2.47 (0.14)         | 1,2%   | 37.2 (2.33)                            | -1,0%  | 1 313            | 2.46 (0.19)         | -5,0%  | 37.9 (2.74)                            | -5,6%  |
| 02-03           | 1 154 | 2.12 (0.17)         | -12,1% | 32.1 (2.54)                            | -11,1% | 8 157              | 2.33 (0.13)         | -4,7%  | 35.0 (2.18)                            | -6,9%  | 2 547            | 2.45 (0.12)         | -5,5%  | 37.4 (2.20)                            | -6,8%  |
| 04-05           | 1 512 | 2.17 (0.16)         | -9,9%  | 32.6 (2.60)                            | -9,7%  | 12 670             | 2.34 (0.13)         | -4,1%  | 34.7 (2.30)                            | -7,7%  | 5 318            | 2.46 (0.13)         | -4,9%  | 37.6 (2.20)                            | -6,3%  |
| 06-07           | 1 546 | 2.18 (0.16)         | -9,6%  | 32.5 (2.62)                            | -10,0% | 12 075             | 2.36 (0.12)         | -3,3%  | 35.0 (2.09)                            | -6,8%  | 5 093            | 2.49 (0.11)         | -3,8%  | 37.8 (1.89)                            | -6,0%  |
| 08-09           | 1 416 | 2.26 (0.13)         | -6,1%  | 33.0 (2.27)                            | -8,5%  | 12 591             | 2.37 (0.12)         | -3,0%  | 34.9 (1.98)                            | -7,1%  | 6 061            | 2.52 (0.12)         | -2,6%  | 38.2 (2.06)                            | -4,9%  |
| 10-11           | 1 131 | 2.22 (0.12)         | -7,8%  | 32.3 (1.98)                            | -10,5% | 10 401             | 2.36 (0.13)         | -3,2%  | 34.5 (2.13)                            | -8,2%  | 5 769            | 2.52 (0.13)         | -2,8%  | 38.0 (2.24)                            | -5,4%  |
| 12-13           | 1 212 | 2.23 (0.10)         | -7,4%  | 32.1 (1.89)                            | -11,2% | 13 049             | 2.36 (0.12)         | -3,3%  | 34.4 (2.03)                            | -8,4%  | 9 075            | 2.49 (0.13)         | -3,7%  | 37.9 (2.22)                            | -5,8%  |
| 14-15           | 982   | 2.15 (0.13)         | -11,0% | 30.8 (2.21)                            | -14,7% | 11 722             | 2.33 (0.12)         | -4,4%  | 34.0 (1.94)                            | -9,6%  | 8 190            | 2.47 (0.11)         | -4,8%  | 37.3 (1.88)                            | -7,2%  |
| 16-17           | 521   | 2.14 (0.10)         | -11,1% | 31.4 (1.44)                            | -13,1% | 7 351              | 2.32 (0.13)         | -4,7%  | 34.0 (2.04)                            | -9,6%  | 5 592            | 2.48 (0.11)         | -4,3%  | 37.4 (1.71)                            | -6,9%  |
| <b>Men</b>      |       |                     |        |                                        |        |                    |                     |        |                                        |        |                  |                     |        |                                        |        |
| <b>≤9 years</b> |       |                     |        |                                        |        | <b>10-12 years</b> |                     |        |                                        |        | <b>≥12 years</b> |                     |        |                                        |        |
| Year            | n     | L·min <sup>-1</sup> |        | ml·min <sup>-1</sup> ·kg <sup>-1</sup> |        | n                  | L·min <sup>-1</sup> |        | ml·min <sup>-1</sup> ·kg <sup>-1</sup> |        | n                | L·min <sup>-1</sup> |        | ml·min <sup>-1</sup> ·kg <sup>-1</sup> |        |
|                 |       | Mean (SD)           | Change | Mean (SD)                              | Change |                    | Mean (SD)           | Change | Mean (SD)                              | Change |                  | Mean (SD)           | Change | Mean (SD)                              | Change |
| 95-97           | 453   | 2.98 (0.12)         | Ref    | 36.3 (1.44)                            | Ref    | 1 497              | 3.19 (0.17)         | Ref    | 39.5 (2.33)                            | Ref    | 180              | 3.21 (0.17)         | Ref    | 39.5 (2.08)                            | Ref    |
| 98-99           | 556   | 2.75 (0.20)         | -7,6%  | 33.4 (3.12)                            | -8,0%  | 2 418              | 3.13 (0.17)         | -2,0%  | 38.5 (2.39)                            | -2,5%  | 605              | 3.13 (0.17)         | -2,6%  | 38.3 (2.46)                            | -2,9%  |
| 00-01           | 822   | 2.93 (0.15)         | -1,6%  | 36.2 (2.35)                            | -0,4%  | 4 226              | 3.05 (0.15)         | -4,4%  | 36.7 (2.33)                            | -7,2%  | 1 291            | 3.06 (0.24)         | -4,8%  | 37.2 (3.78)                            | -5,9%  |
| 02-03           | 1 418 | 2.66 (0.20)         | -10,6% | 32.7 (2.81)                            | -9,8%  | 7 394              | 2.97 (0.18)         | -7,0%  | 36.0 (2.38)                            | -8,9%  | 1 959            | 3.14 (0.16)         | -2,3%  | 38.6 (2.23)                            | -2,3%  |
| 04-05           | 2 113 | 2.84 (0.16)         | -4,8%  | 34.8 (2.29)                            | -4,3%  | 11 642             | 2.97 (0.16)         | -6,8%  | 36.4 (1.93)                            | -7,7%  | 4 165            | 3.08 (0.18)         | -4,1%  | 38.0 (2.29)                            | -3,8%  |
| 06-07           | 2 363 | 2.87 (0.14)         | -3,7%  | 34.3 (2.08)                            | -5,5%  | 13 092             | 2.96 (0.16)         | -7,4%  | 35.7 (1.99)                            | -9,7%  | 4 350            | 3.10 (0.17)         | -3,6%  | 38.1 (2.14)                            | -3,5%  |
| 08-09           | 2 755 | 2.71 (0.18)         | -9,1%  | 32.5 (2.51)                            | -10,5% | 15 466             | 2.99 (0.15)         | -6,2%  | 35.8 (1.93)                            | -9,4%  | 5 190            | 3.14 (0.17)         | -2,3%  | 38.4 (2.15)                            | -2,8%  |
| 10-11           | 2 495 | 2.80 (0.14)         | -6,0%  | 33.3 (2.06)                            | -8,2%  | 14 436             | 2.98 (0.15)         | -6,6%  | 35.5 (1.90)                            | -10,2% | 4 945            | 3.18 (0.14)         | -0,9%  | 38.6 (1.83)                            | -2,3%  |
| 12-13           | 3 172 | 2.66 (0.17)         | -10,7% | 31.8 (2.23)                            | -12,3% | 21 789             | 2.95 (0.15)         | -7,6%  | 35.0 (1.94)                            | -11,4% | 8 949            | 3.10 (0.15)         | -3,6%  | 37.9 (2.05)                            | -3,9%  |
| 14-15           | 3 071 | 2.69 (0.15)         | -9,8%  | 32.0 (1.93)                            | -11,9% | 23 325             | 2.91 (0.13)         | -8,7%  | 34.4 (1.77)                            | -13,0% | 8 294            | 3.04 (0.15)         | -5,3%  | 37.1 (2.09)                            | -6,0%  |
| 16-17           | 1 925 | 2.65 (0.16)         | -11,1% | 31.7 (2.03)                            | -12,6% | 15 990             | 2.91 (0.14)         | -8,9%  | 34.1 (1.78)                            | -13,6% | 5 182            | 3.03 (0.16)         | -5,5%  | 36.7 (2.06)                            | -7,1%  |
