# Supplementary material for: Decline in cardiorespiratory fitness in the Swedish working force between 1995 and 2017
Source: PubMed Central journal article supplement (PMC7379642; doi:10.1111/sms.13328), 2018-11-15
Supplement: SMS-29-232-s008.pdf [file SMS-29-232-s008.pdf]

**Supplement Table 8.** Change in VO<sub>2</sub>max (L·min<sup>-1</sup> and ml·min<sup>-1</sup>·kg<sup>-1</sup>) from 1995-1997 to 2016-2017 in relation to length of education and age-group.

| <b>Educational level ≤9 years</b>    |        |                     |        |                                        |        |                    |                     |        |                                        |        |                    |                     |        |                                        |        |  |
|--------------------------------------|--------|---------------------|--------|----------------------------------------|--------|--------------------|---------------------|--------|----------------------------------------|--------|--------------------|---------------------|--------|----------------------------------------|--------|--|
| <b>18-34 years</b>                   |        |                     |        |                                        |        | <b>35-49 years</b> |                     |        |                                        |        | <b>50-74 years</b> |                     |        |                                        |        |  |
| Year                                 | n      | L·min <sup>-1</sup> |        | ml·min <sup>-1</sup> ·kg <sup>-1</sup> |        | n                  | L·min <sup>-1</sup> |        | ml·min <sup>-1</sup> ·kg <sup>-1</sup> |        | n                  | L·min <sup>-1</sup> |        | ml·min <sup>-1</sup> ·kg <sup>-1</sup> |        |  |
|                                      |        | Mean (SD)           | Change | Mean (SD)                              | Change |                    | Mean (SD)           | Change | Mean (SD)                              | Change |                    | Mean (SD)           | Change | Mean (SD)                              | Change |  |
| 95-97                                | 102    | 3.05 (0.31)         | Ref    | 41.3 (1.18)                            | Ref    | 378                | 2.75 (0.33)         | Ref    | 35.6 (0.88)                            | Ref    | 251                | 2.41 (0.31)         | Ref    | 31.4 (1.31)                            | Ref    |  |
| 98-99                                | 111    | 3.14 (0.33)         | 3,0%   | 42.8 (0.69)                            | 3,6%   | 358                | 2.71 (0.25)         | -1,5%  | 35.2 (0.26)                            | -1,1%  | 411                | 2.37 (0.27)         | -1,7%  | 30.5 (0.67)                            | -2,9%  |  |
| 00-01                                | 162    | 2.99 (0.30)         | -2,0%  | 40.3 (0.83)                            | -2,4%  | 567                | 2.69 (0.31)         | -2,2%  | 34.8 (0.14)                            | -2,2%  | 814                | 2.34 (0.24)         | -2,9%  | 30.2 (0.51)                            | -3,8%  |  |
| 02-03                                | 438    | 2.94 (0.34)         | -3,6%  | 40.3 (1.15)                            | -2,4%  | 853                | 2.63 (0.28)         | -4,4%  | 33.7 (0.43)                            | -5,3%  | 1 281              | 2.28 (0.27)         | -5,4%  | 29.6 (0.73)                            | -5,7%  |  |
| 04-05                                | 509    | 3.04 (0.35)         | -0,3%  | 41.2 (0.23)                            | -0,2%  | 1 189              | 2.65 (0.27)         | -3,6%  | 33.7 (0.12)                            | -5,3%  | 1 927              | 2.30 (0.27)         | -4,6%  | 29.7 (0.56)                            | -5,4%  |  |
| 06-07                                | 536    | 3.05 (0.33)         | 0,0%   | 40.5 (0.09)                            | -1,9%  | 1 282              | 2.66 (0.28)         | -3,3%  | 33.5 (0.14)                            | -5,9%  | 2 091              | 2.30 (0.28)         | -4,6%  | 29.5 (0.86)                            | -6,1%  |  |
| 08-09                                | 659    | 2.99 (0.28)         | -2,0%  | 40.1 (0.25)                            | -2,9%  | 1 262              | 2.65 (0.32)         | -3,6%  | 33.2 (0.16)                            | -6,7%  | 2 250              | 2.30 (0.26)         | -4,6%  | 29.2 (0.60)                            | -7,0%  |  |
| 10-11                                | 706    | 2.93 (0.32)         | -3,9%  | 39.1 (0.70)                            | -5,3%  | 1 037              | 2.71 (0.29)         | -1,5%  | 34.0 (0.24)                            | -4,5%  | 1 883              | 2.34 (0.28)         | -2,9%  | 29.6 (0.52)                            | -5,7%  |  |
| 12-13                                | 929    | 2.90 (0.30)         | -4,9%  | 38.2 (0.41)                            | -7,5%  | 1 289              | 2.62 (0.23)         | -4,7%  | 32.9 (0.60)                            | -7,6%  | 2 166              | 2.29 (0.24)         | -5,0%  | 29.0 (0.30)                            | -7,6%  |  |
| 14-15                                | 982    | 2.89 (0.28)         | -5,2%  | 38.2 (0.04)                            | -7,5%  | 1 100              | 2.62 (0.31)         | -4,7%  | 32.6 (0.38)                            | -8,4%  | 1 971              | 2.25 (0.26)         | -6,6%  | 28.4 (0.52)                            | -9,6%  |  |
| 16-17                                | 746    | 2.85 (0.34)         | -6,6%  | 37.0 (0.77)                            | -10,4% | 738                | 2.59 (0.25)         | -5,8%  | 32.4 (0.16)                            | -9,0%  | 962                | 2.26 (0.28)         | -6,2%  | 28.5 (0.51)                            | -9,2%  |  |
| <b>Educational level 10-12 years</b> |        |                     |        |                                        |        |                    |                     |        |                                        |        |                    |                     |        |                                        |        |  |
| <b>18-34 years</b>                   |        |                     |        |                                        |        | <b>35-49 years</b> |                     |        |                                        |        | <b>50-74 years</b> |                     |        |                                        |        |  |
| Year                                 | n      | L·min <sup>-1</sup> |        | ml·min <sup>-1</sup> ·kg <sup>-1</sup> |        | n                  | L·min <sup>-1</sup> |        | ml·min <sup>-1</sup> ·kg <sup>-1</sup> |        | n                  | L·min <sup>-1</sup> |        | ml·min <sup>-1</sup> ·kg <sup>-1</sup> |        |  |
|                                      |        | Mean (SD)           | Change | Mean (SD)                              | Change |                    | Mean (SD)           | Change | Mean (SD)                              | Change |                    | Mean (SD)           | Change | Mean (SD)                              | Change |  |
| 95-97                                | 1 136  | 3.21 (0.38)         | Ref    | 43.9 (0.83)                            | Ref    | 1 513              | 2.85 (0.36)         | Ref    | 37.8 (0.82)                            | Ref    | 567                | 2.42 (0.31)         | Ref    | 32.3 (1.31)                            | Ref    |  |
| 98-99                                | 1 434  | 3.18 (0.38)         | -0,9%  | 43.2 (0.89)                            | -1,6%  | 1 925              | 2.83 (0.31)         | -0,7%  | 37.4 (0.03)                            | -1,1%  | 1 057              | 2.42 (0.27)         | 0,0%   | 32.4 (0.31)                            | 0,3%   |  |
| 00-01                                | 2 446  | 3.18 (0.36)         | -0,9%  | 42.9 (0.48)                            | -2,3%  | 3 642              | 2.82 (0.30)         | -1,1%  | 36.8 (0.01)                            | -2,6%  | 2 310              | 2.39 (0.27)         | -1,2%  | 31.8 (0.20)                            | -1,5%  |  |
| 02-03                                | 4 726  | 3.11 (0.36)         | -3,1%  | 42.0 (0.40)                            | -4,3%  | 6 734              | 2.79 (0.33)         | -2,1%  | 36.4 (0.42)                            | -3,7%  | 4 091              | 2.35 (0.30)         | -2,9%  | 31.2 (0.88)                            | -3,4%  |  |
| 04-05                                | 6 059  | 3.09 (0.36)         | -3,7%  | 41.6 (0.45)                            | -5,2%  | 11 248             | 2.79 (0.33)         | -2,1%  | 36.2 (0.36)                            | -4,2%  | 7 005              | 2.35 (0.28)         | -2,9%  | 31.1 (0.63)                            | -3,7%  |  |
| 06-07                                | 5 855  | 3.07 (0.32)         | -4,4%  | 41.2 (0.09)                            | -6,2%  | 11 715             | 2.80 (0.31)         | -1,8%  | 36.0 (0.20)                            | -4,8%  | 7 597              | 2.37 (0.29)         | -2,1%  | 31.2 (0.65)                            | -3,4%  |  |
| 08-09                                | 6 659  | 3.07 (0.34)         | -4,4%  | 41.0 (0.34)                            | -6,6%  | 12 806             | 2.81 (0.31)         | -1,4%  | 35.8 (0.10)                            | -5,3%  | 8 592              | 2.40 (0.27)         | -0,8%  | 31.2 (0.29)                            | -3,4%  |  |
| 10-11                                | 6 058  | 3.07 (0.32)         | -4,4%  | 40.9 (0.07)                            | -6,8%  | 11 612             | 2.81 (0.31)         | -1,4%  | 35.5 (0.18)                            | -6,1%  | 7 167              | 2.40 (0.28)         | -0,8%  | 31.0 (0.42)                            | -4,0%  |  |
| 12-13                                | 9 154  | 3.06 (0.31)         | -4,7%  | 40.6 (0.03)                            | -7,5%  | 15 713             | 2.78 (0.29)         | -2,5%  | 35.2 (0.08)                            | -6,9%  | 9 971              | 2.39 (0.26)         | -1,2%  | 30.8 (0.29)                            | -4,6%  |  |
| 14-15                                | 10 158 | 2.99 (0.30)         | -6,9%  | 39.8 (0.20)                            | -9,3%  | 14 665             | 2.74 (0.28)         | -3,9%  | 34.6 (0.18)                            | -8,5%  | 10 224             | 2.38 (0.26)         | -1,7%  | 30.4 (0.22)                            | -5,9%  |  |
| 16-17                                | 7 732  | 3.00 (0.30)         | -6,5%  | 39.7 (0.40)                            | -9,6%  | 8 856              | 2.72 (0.28)         | -4,6%  | 34.4 (0.28)                            | -9,0%  | 6 753              | 2.38 (0.27)         | -1,7%  | 30.3 (0.10)                            | -6,2%  |  |

**Educational level >12 years**

| Year  | 18-34 years |                                  |        |                                                     |        | 35-49 years |                                  |        |                                                     |        | 50-74 years |                                  |        |                                                     |        |
|-------|-------------|----------------------------------|--------|-----------------------------------------------------|--------|-------------|----------------------------------|--------|-----------------------------------------------------|--------|-------------|----------------------------------|--------|-----------------------------------------------------|--------|
|       | n           | L·min <sup>-1</sup><br>Mean (SD) | Change | ml·min <sup>-1</sup> ·kg <sup>-1</sup><br>Mean (SD) | Change | n           | L·min <sup>-1</sup><br>Mean (SD) | Change | ml·min <sup>-1</sup> ·kg <sup>-1</sup><br>Mean (SD) | Change | n           | L·min <sup>-1</sup><br>Mean (SD) | Change | ml·min <sup>-1</sup> ·kg <sup>-1</sup><br>Mean (SD) | Change |
| 95-97 | 116         | 3.22 (0.36)                      | Ref    | 45.9 (0.72)                                         | Ref    | 304         | 2.78 (0.32)                      | Ref    | 39.0 (0.34)                                         | Ref    | 207         | 2.53 (0.27)                      | Ref    | 34.4 (0.11)                                         | Ref    |
| 98-99 | 295         | 3.24 (0.36)                      | 0,6%   | 46.1 (0.21)                                         | 0,4%   | 566         | 2.79 (0.31)                      | 0,4%   | 38.3 (0.13)                                         | -1,8%  | 386         | 2.49 (0.28)                      | -1,6%  | 33.9 (0.46)                                         | -1,5%  |
| 00-01 | 861         | 3.22 (0.38)                      | 0,0%   | 45.6 (0.58)                                         | -0,7%  | 1 039       | 2.86 (0.32)                      | 2,9%   | 39.7 (0.18)                                         | 1,8%   | 704         | 2.48 (0.34)                      | -2,0%  | 33.8 (1.07)                                         | -1,7%  |
| 02-03 | 1 399       | 3.12 (0.43)                      | -3,1%  | 44.6 (1.12)                                         | -2,8%  | 1 842       | 2.80 (0.36)                      | 0,7%   | 38.7 (0.68)                                         | -0,8%  | 1 265       | 2.42 (0.30)                      | -4,3%  | 33.1 (0.72)                                         | -3,8%  |
| 04-05 | 3 049       | 3.13 (0.38)                      | -2,8%  | 44.6 (0.40)                                         | -2,8%  | 3 857       | 2.81 (0.35)                      | 1,1%   | 38.6 (0.60)                                         | -1,0%  | 2 577       | 2.40 (0.30)                      | -5,1%  | 32.6 (0.78)                                         | -5,2%  |
| 06-07 | 3 352       | 3.13 (0.38)                      | -2,8%  | 44.3 (0.64)                                         | -3,5%  | 3 870       | 2.83 (0.35)                      | 1,8%   | 38.5 (0.61)                                         | -1,3%  | 2 221       | 2.44 (0.27)                      | -3,6%  | 32.9 (0.19)                                         | -4,4%  |
| 08-09 | 3 950       | 3.14 (0.37)                      | -2,5%  | 44.6 (0.25)                                         | -2,8%  | 4 584       | 2.89 (0.34)                      | 4,0%   | 39.2 (0.44)                                         | 0,5%   | 2 717       | 2.48 (0.29)                      | -2,0%  | 33.3 (0.46)                                         | -3,2%  |
| 10-11 | 3 576       | 3.14 (0.34)                      | -2,5%  | 44.5 (0.23)                                         | -3,1%  | 4 969       | 2.89 (0.35)                      | 4,0%   | 39.3 (0.56)                                         | 0,8%   | 2 169       | 2.51 (0.30)                      | -0,8%  | 33.4 (0.74)                                         | -2,9%  |
| 12-13 | 5 654       | 3.10 (0.34)                      | -3,7%  | 44.2 (0.02)                                         | -3,7%  | 8 649       | 2.86 (0.33)                      | 2,9%   | 39.2 (0.34)                                         | 0,5%   | 3 721       | 2.47 (0.27)                      | -2,4%  | 32.9 (0.13)                                         | -4,4%  |
| 14-15 | 5 288       | 3.03 (0.35)                      | -5,9%  | 42.9 (0.36)                                         | -6,5%  | 7 960       | 2.81 (0.31)                      | 1,1%   | 38.4 (0.14)                                         | -1,5%  | 3 236       | 2.48 (0.27)                      | -2,0%  | 32.9 (0.19)                                         | -4,4%  |
| 16-17 | 3 466       | 3.04 (0.34)                      | -5,6%  | 42.6 (0.08)                                         | -7,2%  | 5 099       | 2.79 (0.31)                      | 0,4%   | 38.0 (0.16)                                         | -2,6%  | 2 209       | 2.53 (0.29)                      | 0,0%   | 33.4 (0.38)                                         | -2,9%  |
