# Supplementary material for: Decline in cardiorespiratory fitness in the Swedish working force between 1995 and 2017
Source: PubMed Central journal article supplement (PMC7379642; doi:10.1111/sms.13328), 2018-11-15
Supplement: SMS-29-232-s009.pdf [file SMS-29-232-s009.pdf]

**Supplement Table 9.** Standardized proportions with a low VO2max (ml·min<sup>-1</sup>·kg<sup>-1</sup>) using different cut-offs, in the total population and by sex.

| Year  | Women  |          |        |          | Men    |          |        |          | Total  |          |        |          |
|-------|--------|----------|--------|----------|--------|----------|--------|----------|--------|----------|--------|----------|
|       | <32 ml | <28.5 ml | <25 ml | <21.5 ml | <32 ml | <28.5 ml | <25 ml | <21.5 ml | <32 ml | <28.5 ml | <25 ml | <21.5 ml |
| 95-97 | 28,3%  | 16,5%    | 7,9%   | 3,6%     | 26,3%  | 14,5%    | 6,2%   | 2,5%     | 27,3%  | 15,6%    | 7,1%   | 3,1%     |
| 98-99 | 37,9%  | 26,9%    | 8,7%   | 2,8%     | 35,1%  | 20,3%    | 11,6%  | 2,3%     | 36,5%  | 23,6%    | 10,2%  | 2,5%     |
| 00-01 | 36,7%  | 20,6%    | 11,3%  | 3,2%     | 38,0%  | 18,3%    | 9,7%   | 5,0%     | 37,4%  | 19,4%    | 10,5%  | 4,1%     |
| 02-03 | 43,7%  | 27,3%    | 14,1%  | 5,5%     | 39,7%  | 27,2%    | 16,3%  | 4,0%     | 41,7%  | 27,2%    | 15,2%  | 4,8%     |
| 04-05 | 43,3%  | 29,1%    | 15,6%  | 6,2%     | 37,5%  | 23,3%    | 9,2%   | 3,7%     | 40,4%  | 26,2%    | 12,4%  | 5,0%     |
| 06-07 | 41,0%  | 26,8%    | 14,4%  | 4,7%     | 38,4%  | 24,3%    | 12,1%  | 4,6%     | 39,7%  | 25,5%    | 13,3%  | 4,7%     |
| 08-09 | 40,3%  | 25,5%    | 14,0%  | 5,8%     | 40,5%  | 26,6%    | 13,7%  | 4,7%     | 40,4%  | 26,1%    | 13,9%  | 5,2%     |
| 10-11 | 43,6%  | 29,1%    | 16,8%  | 6,9%     | 39,4%  | 26,1%    | 13,9%  | 5,1%     | 41,5%  | 27,6%    | 15,3%  | 6,0%     |
| 12-13 | 43,2%  | 29,8%    | 16,7%  | 7,3%     | 43,2%  | 28,5%    | 15,6%  | 6,8%     | 43,2%  | 29,1%    | 16,1%  | 7,0%     |
| 14-15 | 44,9%  | 31,4%    | 18,7%  | 8,5%     | 45,8%  | 30,7%    | 16,4%  | 7,0%     | 45,4%  | 31,0%    | 17,5%  | 7,8%     |
| 16-17 | 45,6%  | 31,8%    | 17,2%  | 6,7%     | 45,5%  | 31,4%    | 18,6%  | 7,6%     | 45,6%  | 31,6%    | 17,9%  | 7,2%     |
