# Supplementary material for: Decline in cardiorespiratory fitness in the Swedish working force between 1995 and 2017
Source: PubMed Central journal article supplement (PMC7379642; doi:10.1111/sms.13328), 2018-11-15
Supplement: SMS-29-232-s010.pdf [file SMS-29-232-s010.pdf]

**Supplement Table 10.** Test for equality of variance in unstandardized mean (SD) of relative VO<sub>2</sub>max in the first five years (1995-1999) and and the last five years (2013-2017) in relation to sub-groups of sex, age and educational level.

| <b>Women</b>     |                         |             |             |           |                                                |                |
|------------------|-------------------------|-------------|-------------|-----------|------------------------------------------------|----------------|
| <b>Age-group</b> | <b>Education length</b> | <b>Year</b> | <b>Mean</b> | <b>SD</b> | <b>Levene's Test for Equality of Variances</b> |                |
|                  |                         |             |             |           | <b>F-value</b>                                 | <b>p-value</b> |
| 18-34 years      | <12 years               | 1995-1999   | 42.6        | 9.7       |                                                |                |
|                  |                         | 2013-2017   | 39.9        | 10.2      | 2.37                                           | 0.124          |
|                  | ≥12 years               | 1995-1999   | 46.1        | 10.3      |                                                |                |
|                  |                         | 2013-2017   | 42.8        | 10.2      | 0.38                                           | 0.538          |
| 35-49 years      | <12 years               | 1995-1999   | 36.9        | 9.2       |                                                |                |
|                  |                         | 2013-2017   | 34.8        | 9.2       | 0.06                                           | 0.803          |
|                  | ≥12 years               | 1995-1999   | 38.4        | 8.8       |                                                |                |
|                  |                         | 2013-2017   | 38.3        | 9.7       | 8.09                                           | 0.004          |
| 50-74 years      | <12 years               | 1995-1999   | 31.2        | 7.8       |                                                |                |
|                  |                         | 2013-2017   | 30.0        | 7.8       | 1.19                                           | 0.274          |
|                  | ≥12 years               | 1995-1999   | 33.8        | 7.8       |                                                |                |
|                  |                         | 2013-2017   | 32.8        | 8.3       | 3.16                                           | 0.076          |
| <b>Men</b>       |                         |             |             |           |                                                |                |
| <b>Age-group</b> | <b>Education length</b> | <b>Year</b> | <b>Mean</b> | <b>SD</b> | <b>Levene's Test for Equality of Variances</b> |                |
|                  |                         |             |             |           | <b>F-value</b>                                 | <b>p-value</b> |
| 18-34 years      | <12 years               | 1995-1999   | 44.1        | 10.3      |                                                |                |
|                  |                         | 2013-2017   | 39.6        | 9.9       | 6.29                                           | 0.012          |
|                  | ≥12 years               | 1995-1999   | 46.0        | 10.5      |                                                |                |
|                  |                         | 2013-2017   | 43.2        | 10.5      | 0.45                                           | 0.501          |
| 35-49 years      | <12 years               | 1995-1999   | 37.4        | 8.9       |                                                |                |
|                  |                         | 2013-2017   | 34.3        | 8.8       | 0.05                                           | 0.822          |
|                  | ≥12 years               | 1995-1999   | 38.8        | 8.7       |                                                |                |
|                  |                         | 2013-2017   | 38.7        | 9.6       | 9.78                                           | 0.002          |
| 50-74 years      | <12 years               | 1995-1999   | 32.5        | 7.5       |                                                |                |
|                  |                         | 2013-2017   | 30.3        | 7.6       | 0.46                                           | 0.499          |
|                  | ≥12 years               | 1995-1999   | 34.4        | 7.5       |                                                |                |
|                  |                         | 2013-2017   | 33.2        | 8.3       | 4.05                                           | 0.044          |
